# Supplementary material for: Lung microbiome and host immune tone in subjects with idiopathic pulmonary fibrosis treated with inhaled interferon-γ
Source: PubMed Central journal article supplement — ERJ Open Res. 2017 Jul 12;3(3):00008-2017. doi: 10.1183/23120541.00008-2017 (PMC5507144; doi:10.1183/23120541.00008-2017), 2017-07-12
Supplement: 00008-2017_Wu.pdf [file 00008-2017_Wu.pdf]

# Please wait...

If this message is not eventually replaced by the proper contents of the document, your PDF viewer may not be able to display this type of document.

You can upgrade to the latest version of Adobe Reader for Windows®, Mac, or Linux® by visiting [http://www.adobe.com/go/reader\\_download](http://www.adobe.com/go/reader_download).

For more assistance with Adobe Reader visit <http://www.adobe.com/go/acrreader>.

Windows is either a registered trademark or a trademark of Microsoft Corporation in the United States and/or other countries. Mac is a trademark of Apple Inc., registered in the United States and other countries. Linux is the registered trademark of Linus Torvalds in the U.S. and other countries.
